# Supplementary material
Source: MDPI journal article supplement (https://www.mdpi.com/2673-4591/10/1/12)
Supplement: s1 [file s1]

# Computer vision technique for blind identification of modal frequency of structures from video measurements.

Vishal Allada and T. Jothi Saravanan

School of Infrastructure  
Indian Institute of Technology Bhubaneswar  
Odisha, India.

 **The 8th International Electronic Conference on Sensors and Applications**

(Student Session)

# CONTENTS

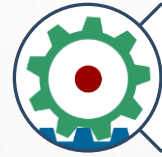

Objective

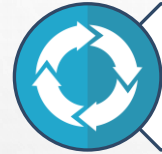

Methodology

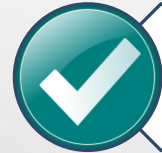

Validation

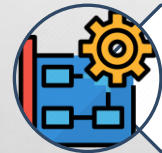

Implementation on real-life structure

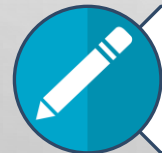

Conclusion

## Objective:

To extract the modal frequencies of the structure from structure's video, by estimating the time history data of the structure, using computer vision techniques like complex steerable pyramids, and separating the modal frequencies using principal component analysis (PCA) and analytical mode decomposition (AMD).

# Methodology:

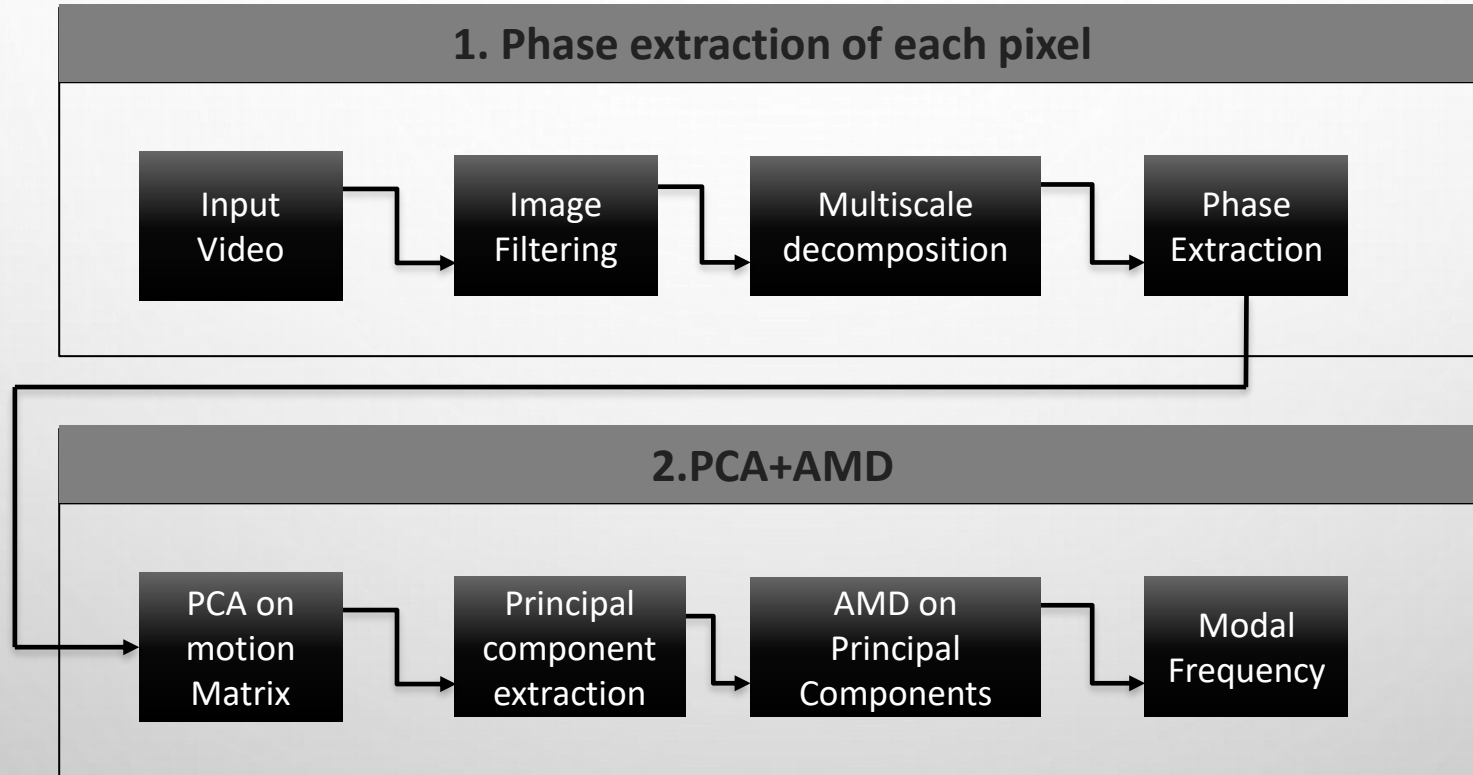

**Figure 1 - Flowchart of proposed method**

# Validation:

The proposed method is validated on a 10 DOF numerical model

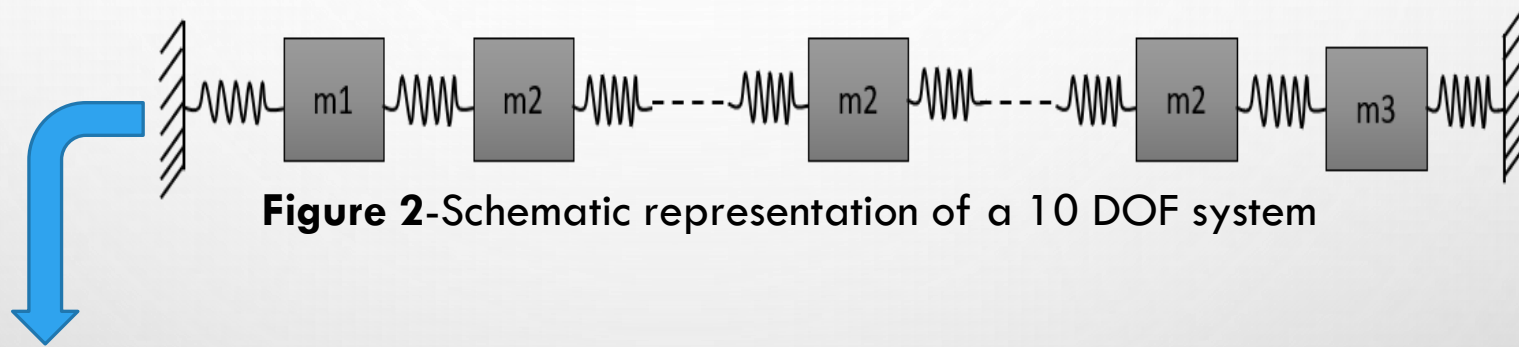

**Figure 2-**Schematic representation of a 10 DOF system

New 10 channel output with 4 modes dominant is generated by Newmark Beta Algorithm

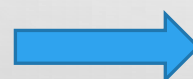

PCA for dimension reduction

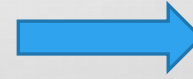

AMD for signal decomposition

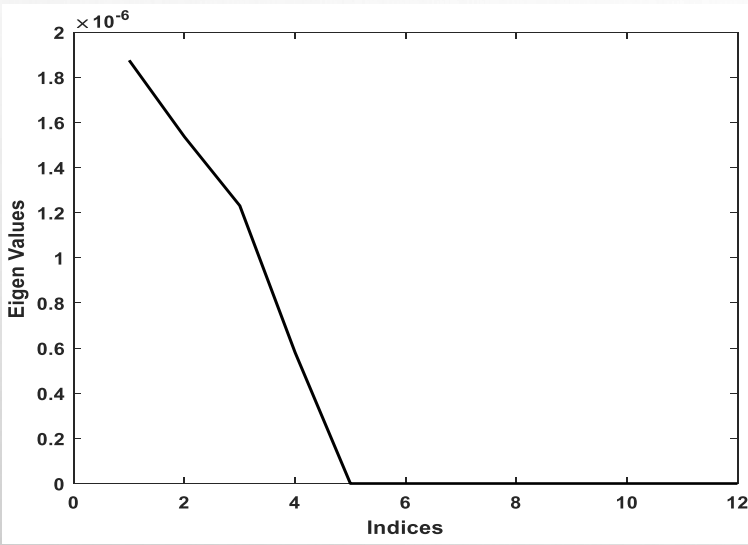

**Figure 3 – Eigen Value Decomposition of covariance of motion matrix**

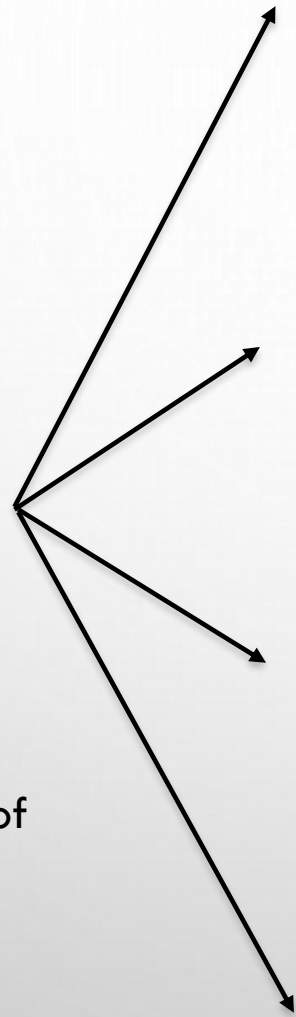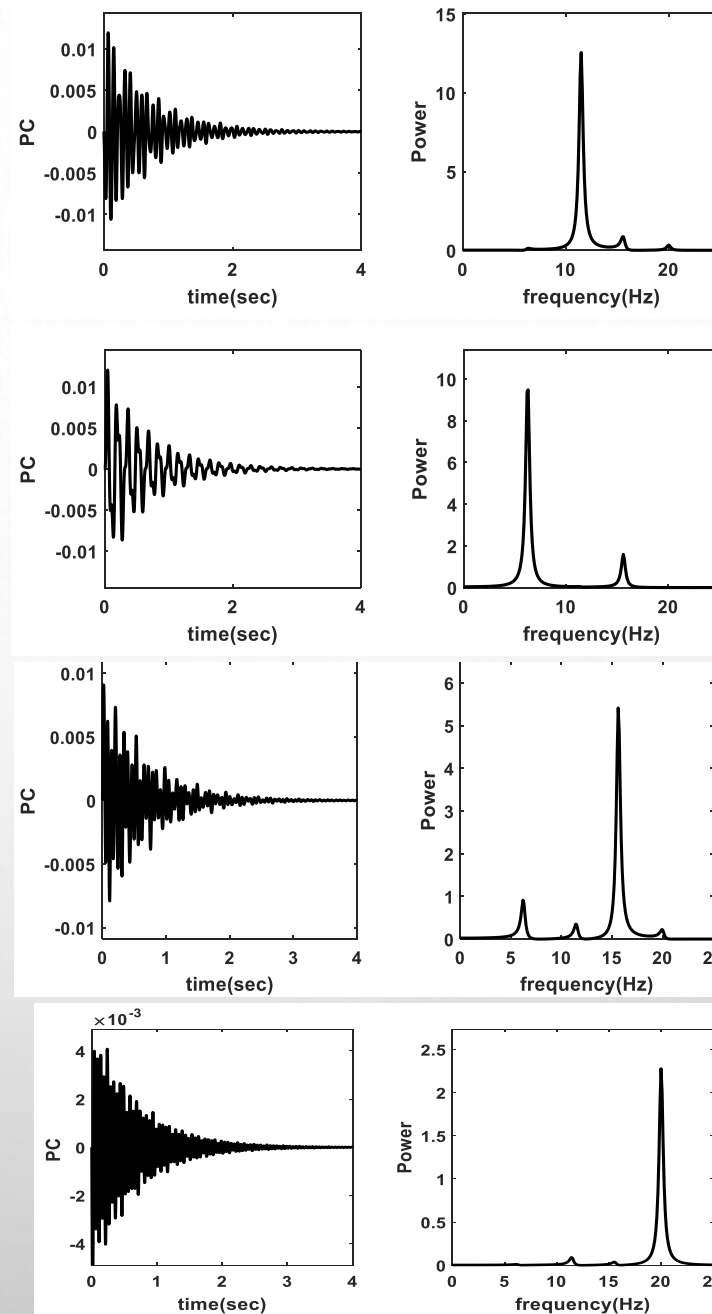

(Principal coordinate 1)

(Principal coordinate 2)

(Principal coordinate 3)

(Principal coordinate 4)

**Figure 4 – Principal coordinates of numerical model**



# Results of Numerical model

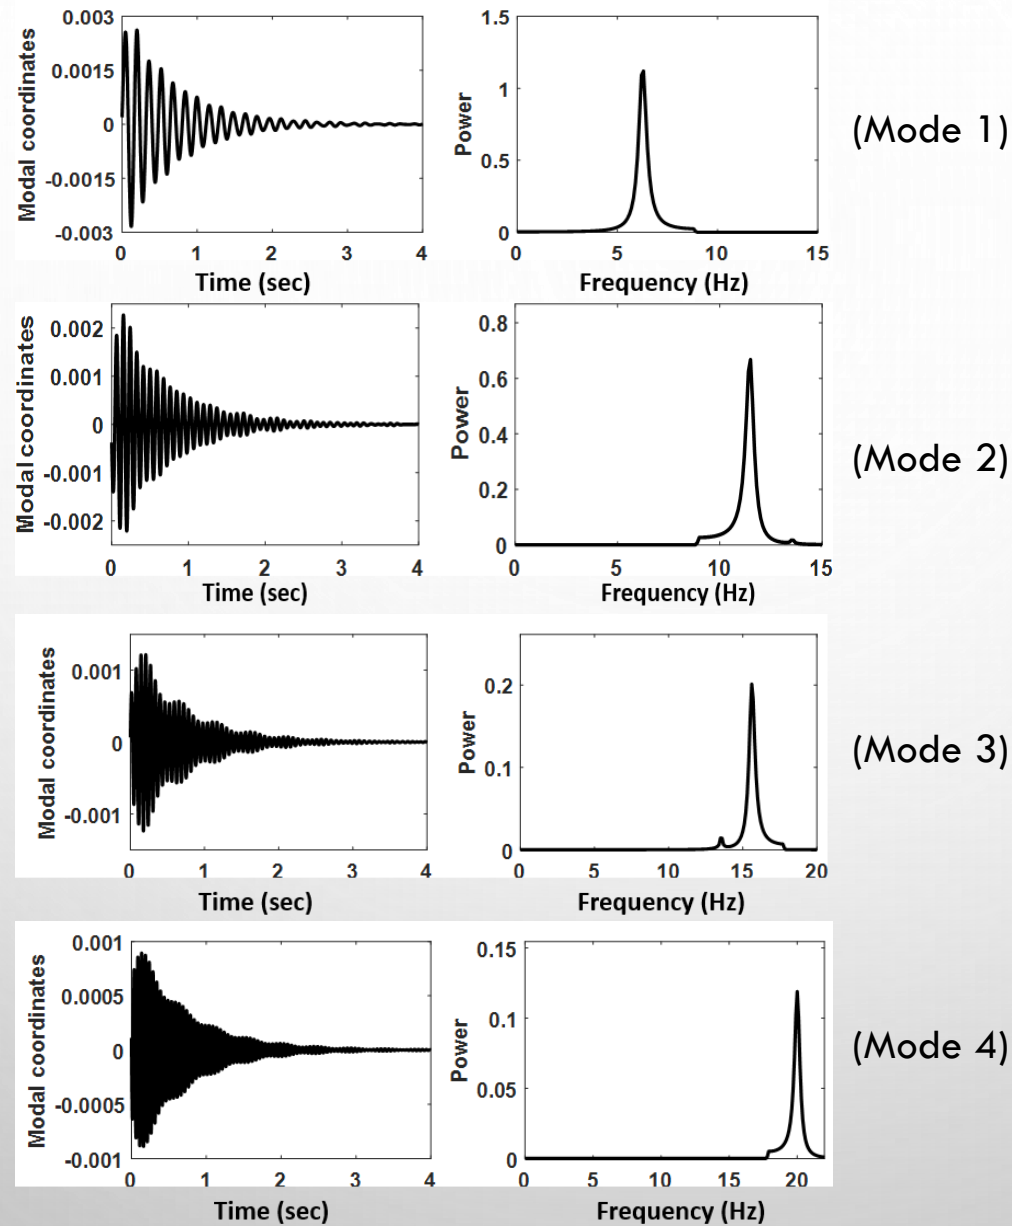

| Mode | Frequency (Hz) |           | Error % |
|------|----------------|-----------|---------|
|      | Theoretical    | Estimated |         |
| 1    | 6.25           | 6.30      | 0.8     |
| 2    | 11.45          | 11.50     | 0.09    |
| 3    | 15.62          | 15.60     | 0.13    |
| 4    | 20.03          | 20.00     | 0.15    |

**Table 1 – Results comparison**

**Figure 5 – Extracted modes**

# Implementation:

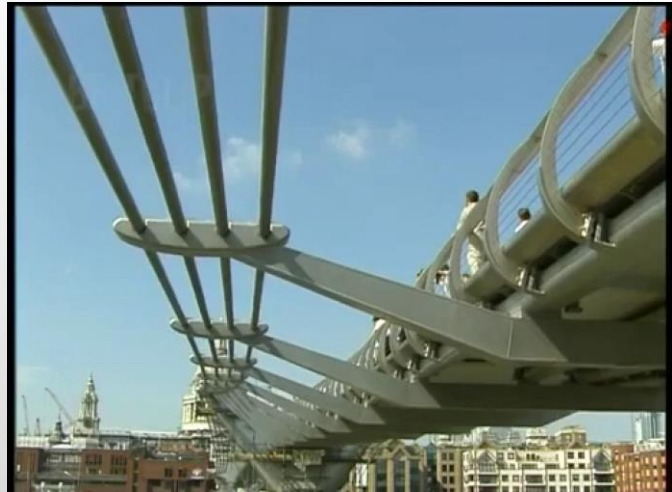

**Figure 6** – Actual frame of video of London Millennium bridge, used for analysis.

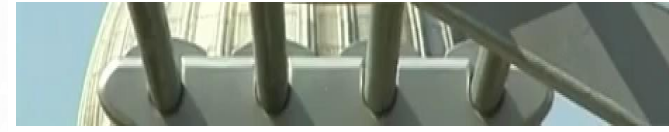

**Figure 7** – Cropped frame

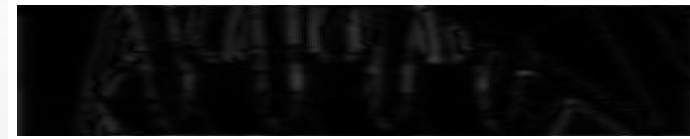

**Figure 8** – Amplitude part

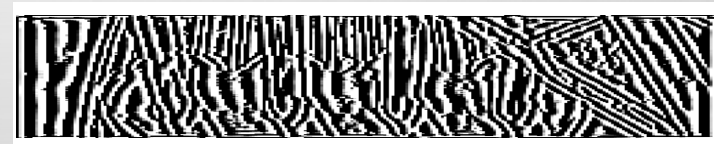

**Figure 9** – Phase part



# Results of Numerical model

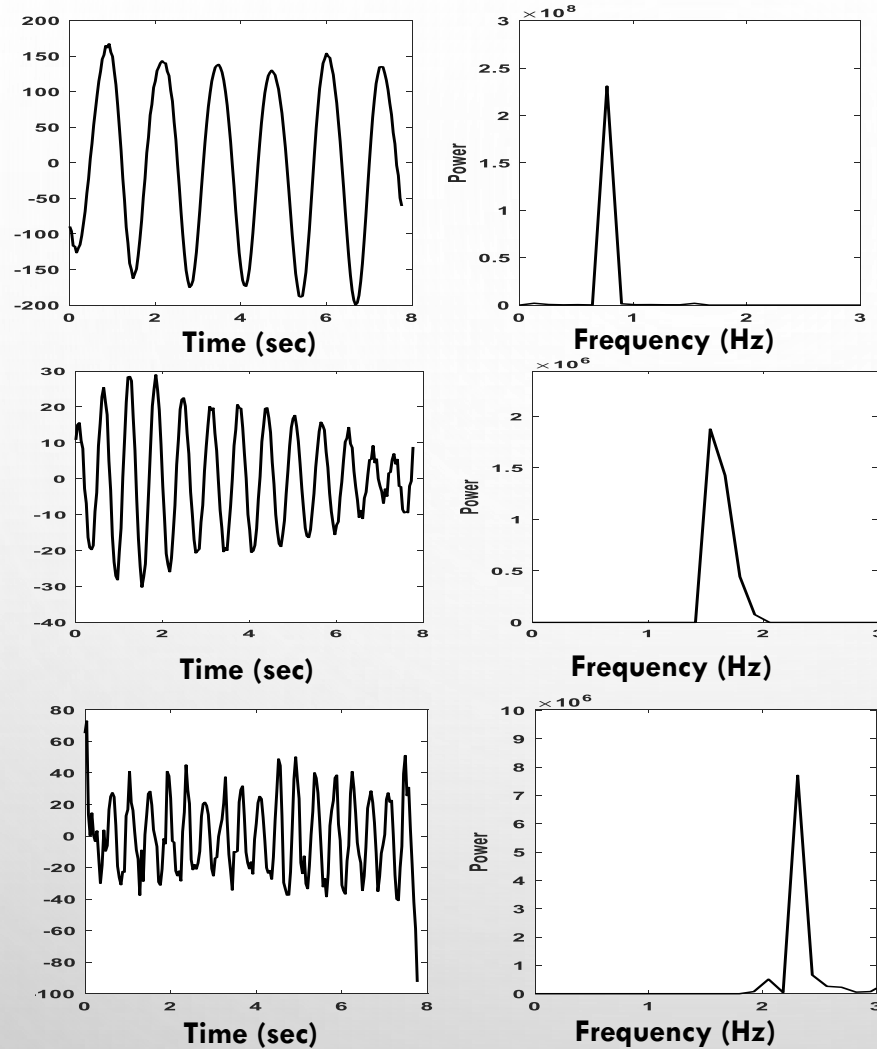

**Figure 10** – Modes extracted from video of London Millennium bridge

| Mode | Frequency (Hz)       |           | Error % |
|------|----------------------|-----------|---------|
|      | From Pavic, A et. Al | Estimated |         |
| 1    | 0.77                 | 0.769     | 0.13    |
| 2    | 1.54                 | 1.53      | 0.65    |
| 3    | 2.32                 | 2.31      | 0.43    |

**Table 2** – Results comparison

## Conclusion:

- This study develops a hybrid output-only OMA algorithm that uses PCA and AMD to blindly extract the modal frequencies and modal coordinates from line-of-sight video measurement of the structures
- The 10-DOF dynamic numerical model validation and implementation on London Millennium Bridge resulted in more than 99% accuracy in detecting the modal frequencies.
- Henceforth, the recommended algorithm can be utilized for an effective non-contact OMA using a computer vision monitoring system.

*Thank You*
